# Supplementary material for: Ecosystem services approach in national park planning: factors influencing the inhabitants’ perspectives on local natural resources and protected areas
Source: Research Square preprint supplement (doi:10.21203/rs.3.rs-1501744/v1), 2022-04-05
Supplement: Supplementary file 11 [file f5e31060299ce652a39e389d.docx]

Annex No. 2 Translated questionnaire form

| MUNICIPALITY: | INTERVIEWER CODE : | SURVEY NO : | DATE: |
| --- | --- | --- | --- |

*Ladies and Gentlemen,*

*The Institute of Environmental Sciences of the Jagiellonian University in Krakow conducts research on the social and economic conditions of nature conservation in the Przemyśl Foothills and the Słonne Mountains. We kindly ask you to complete this questionnaire. Your answers will enable a better understanding of your attitude towards the nature around you and the perceived benefits it provides to people. The survey is anonymous and the information obtained will be used only for scientific purposes.*

*In each question, please mark the answer closest to your beliefs. Please remember that there are no right or wrong answers. All your opinions are valuable to us.*

*Yours sincerely*

*Mariusz Boćkowski, MA*

**Contact data**: Uniwersytet Jagielloński, Instytut Nauk o Środowisku, Gronostajowa 7, 30-387 Kraków; email:**mariusz.bockowski@doctoral.uj.edu.pl**; Tel. number **796 636 389**

1. **1. Please indicate to what extent you agree with the following statements.** Please circle only **ONE** answer for each question on the scale from **1 (No, I completely disagree)** to **5 (Yes, I fully agree).**

|  | When man interferes with the functioning of nature, it often brings negative consequences | 1 | 2 | 3 | 4 | 5 |
| --- | --- | --- | --- | --- | --- | --- |
|  | Nature conservation objectives should be based on moral values | 1 | 2 | 3 | 4 | 5 |
|  | Entrepreneurship (financial resourcefulness) can be a factor positively influencing nature protection | 1 | 2 | 3 | 4 | 5 |
|  | People have the right to modify the natural environment to meet their needs | 1 | 2 | 3 | 4 | 5 |
|  | The most important source of information when taking actions to protect nature should be biological knowledge | 1 | 2 | 3 | 4 | 5 |
|  | Nature conservation can improve human well-being by supporting economic development | 1 | 2 | 3 | 4 | 5 |
|  | Plants and animals have the same right to live as humans | 1 | 2 | 3 | 4 | 5 |
|  | Planning of nature protection should take into account the knowledge of local residents | 1 | 2 | 3 | 4 | 5 |
|  | Increasing people's wealth increases the negative impact on nature | 1 | 2 | 3 | 4 | 5 |
|  | Virgin, untouched nature does not exist | 1 | 2 | 3 | 4 | 5 |
|  | The aim of nature conservation should be to improve the well-being of all people | 1 | 2 | 3 | 4 | 5 |
|  | Nature conservation objectives should be based on scientific arguments | 1 | 2 | 3 | 4 | 5 |
|  | Conservation of nature only makes sense when it provides human benefits | 1 | 2 | 3 | 4 | 5 |

**B.1.** Below you will find a list of the benefits of nature that nature can provide for man in your commune. **Please select up to 5 benefits** that, in your opinion, occur in the commune and are **the most important for your quality of life**. **Please mark them with letters from 1 to 5**, where 1 - the most important and 5 - less important, **in the field next to the name of the benefits**:

| Harvesting plants (incl. orcharding) |  | Puryfing water/air |  |
| --- | --- | --- | --- |
| Animal farming (incl. grazing, ponds, apiary) |  | Sourcing wood for heating purposes |  |
| Sourcing water for farming/industrial purposes |  | Sourcing wood for non-heating purposes |  |
| Sourcing drinking water |  | Flood and drought protection |  |
| Scientific research |  | Noise protection |  |
| Extracting clay/gravel/minerals |  | Ecological education |  |
| Spiritual or religous values |  | Cultural heritage |  |
| Practising sport/tourism/recreation |  | Landscape values |  |
| Habitat of wild pollinators |  | Inherent value/value of being |  |
| Picking up wild mushrooms/herbs/berries |  | Erosion control |  |
| Sourcing wild animals and derivatives |  | Mitigating climate extremes |  |
| Other – what?........................................... |  |

**Do you make financial gains from any of the above benefits from nature?** If **YES**, please select such benefits from the list above by **adding an "X" next to the benefit name**.

| B. 2. In your opinion, is the possibility of obtaining any of the benefits selected above limited for you for any reason? YES / NO |  |
| --- | --- |
| If YES, which one? Please provide the number of the benefit concerned and justify your choice:………………………………………………………………………………………… |  |
| B. 3. Do you think that all (in your commune) residents have equal access to these benefits? Please choose YES or NO next to the benefit number, or leave it without answer if I DON'T know  1 YES / NO 2 YES / NO 3 YES/ NO 4 YES / NO 5 YES / NO |  |
| B. 4. In your opinion, do people from outside the commune also benefit from the benefits indicated by you? Please answer YES or NO next to the benefit number or leave it without answer if you DON'T KNOW  1 YES / NO 2 YES / NO 3 YES / NO 4 YES / NO 5 YES / NO | |
| B. 5. Do you see any threats to delivering the benefits of nature you have chosen? YES / NO  If NO, please go to Part "C" of the questionnaire  If YES, what are they? Please provide the benefit number affected and justify your choice: |  |
| 6. The creation of national parks serves the interests of only a part of the society  ………………………………………………………………………………………………………… |  |

**C.1. Please indicate to what extent you agree with the following statements.** Please circle only **ONE** answer for each question on the scale from **1 (No, I completely disagree) to 5 (Yes, I fully agree).**

| 1. National parks protect against excessive use of environment | | | | | | | | | | | | | | | | | | | | | | 1 | | | | | 2 | | | 3 | | | 4 | | | 5 | | | |
| --- | --- | --- | --- | --- | --- | --- | --- | --- | --- | --- | --- | --- | --- | --- | --- | --- | --- | --- | --- | --- | --- | --- | --- | --- | --- | --- | --- | --- | --- | --- | --- | --- | --- | --- | --- | --- | --- | --- | --- |
| 1. National parks prevent local people from use of forest | | | | | | | | | | | | | | | | | | | | | | 1 | | | | | 2 | | | 3 | | | 4 | | | 5 | | | |
| 1. National parks may stimulate local development | | | | | | | | | | | | | | | | | | | | | | 1 | | | | | 2 | | | 3 | | | 4 | | | 5 | | | |
| 1. National parks hinder disposal of own property | | | | | | | | | | | | | | | | | | | | | | 1 | | | | | 2 | | | 3 | | | 4 | | | 5 | | | |
| 1. National parks protect heritage of all Poles | | | | | | | | | | | | | | | | | | | | | | 1 | | | | | 2 | | | 3 | | | 4 | | | 5 | | | |
| 1. Creation of national parks serves the interests of only a fraction of society | | | | | | | | | | | | | | | | | | | | | | 1 | | | | | 2 | | | 3 | | | 4 | | | 5 | | | |
| 1. Living within national park may be reason to be proud | | | | | | | | | | | | | | | | | | | | | | 1 | | | | | 2 | | | 3 | | | 4 | | | 5 | | | |
| 1. National parks are no longer needed, because they may be replaced by other forms of nature protection | | | | | | | | | | | | | | | | | | | | | | 1 | | | | | 2 | | | 3 | | | 4 | | | 5 | | | |
| C.2. Have you heard about the planned Turnicki National Park (TuPN)? | | | | | | | | | | | | | | | | | | | | | | | | | | | | | | | YES / NO | | | | | | | | |
| If NO, please go to section "D" of the questionnaire | | | | | | | | | | | | | | | | | | |  | | | | | | | | | | | | | | | | | | | | |
| If YES, what are your sources of knowledge about the planned TuPN?  *In this question, you can select any number of answers and add the answer "other"* | | | | | | | | | | | | | | | | | | 1. Friends / neighbors 2. Family 3. Nature protection institutions 4. Local government 5. State Forests 6. Non-governmental organization 7. Television 8. Press 9. Internet 10. Other - what?. …………………. | | | | | | | | | | | | | | | | | | | | | |
| C.3. How far from the border of the planned Turnicki National Park would your farm be? Please select ONE of the following answers: | | | | | | | | | | | | | | | | | | | | | | | | | | | | | | | | | | | | | | | |
| Inside the park | | |  | | | Up to 5 km |  | | Up to 10 km | | |  | | Up to 30 km | | | | | |  | | | | | I do not know | | | | | | |  | | |  | | | |
| C.4. Compared to the area of ​​the Bircza Forest District, what would be the range of the currently planned Turnicki National Park? Please select ONE of the following answers: | | | | | | | | | | | | | | | | | | | | | | | | | | | | | | | | | | | | | | | |
| Smaller | | |  | | | Similar |  | | Larger | | |  | | Not yet defined | | | | | |  | | | | | I do not know | | | | | | |  | | |  | | | |
| C.5. Do you see the potential benefits for the local community from the creation of the Turnicki National Park? | | | | | | | | | | | | | | | | | | | | | | | | | | | | | YES / NO | | | | | | | | | | |
| If YES, please indicate what these benefits are:  ................................................................................................................................................................  …………………………………………………………………………………………………………………… | | | | | | | | | | | | | | | | | | | | | | | | | | | | | | | | | | | | | | | |
| C. 6. Do you see potential losses for the local community from the creation of the Turnicki National Park? | | | | | | | | | | | | | | | | | | | | | | | | | | | | | YES / NO | | | | | | | | | | |
| If YES, please indicate what the losses are:  ................................................................................................................................................................  …………………………………………………………………………………………………………………… | | | | | | | | | | | | | | | | | | | | | | | | | | | | | | | | | | | | | | | |
|  | | | | | | | | | | | | | | | | | | | | | | | | | | | | | | | | | | | | | | | |
|  | | | | | | | | | | | | | | | | | | | | | | | | | | | | | | | | | | | | | | | |
| C. 7. What is your attitude towards the establishment of the Turnicki National Park? | | | | | | | | | | | | | | | | | | | | | | | | | | | | | | | | | | | | | | | |
| Negative |  | | | Rather negative | | | |  | | Neutral | | |  | | | rather positive | | | | |  | | | | | | | positive | | | | | |  | | |  | | |
| C. 8. Please list the main reasons for the above answer::  ……………………………………………………………………………………………………………………………………………………………………………………………………………………………………………… | | | | | | | | | | | | | | | | | | | | | | | | | | | | | | | | | | | | | | | |
| D.1. Do you or a member of your immediate family run a farm? | | | | | | | | | | | | | | | YES / NO | | | | | | | | | | | | | | | | | | | | | | | | | |
| If YES, what kind of activity?  *In this question, you can select any number of answers and add the answer "other"* | | | | | | | | | | | | | | | 1. production and distribution of certified regional products; 2. production and distribution of uncertified regional products; 3. other (what)? ......................................... | | | | | | | | | | | | | | | | | | | | | | | | | |
| D. 2. If NO, do you or a member of your immediate family plan to reap benefits from running a farm in the future? | | | | | | | | | | | | | | | YES / NO | | | | | | | | | | | | | | | | | | | | | | | | | |
| If YES, what kind of activity?  *In this question, you can select any number of answers and add the answer "other"* | | | | | | | | | | | | | | | 1. production and distribution of certified regional products; 2. production and distribution of uncertified regional products; 3. other (what)? ......................................... | | | | | | | | | | | | | | | | | | | | | | | | | |
| D.3. Is your or your immediate family member's income at least partially related to tourism? | | | | | | | | | | | | | | | YES / NO | | | | | | | | | | | | | | | | | | | | | | | | | |
| If YES, from what kind of activity?  *In this question, you can select any number of answers and add the answer "other"* | | | | | | | | | | | | | | | 1. agritourism; 2. catering services; 3. companies providing guide services; 4. companies providing transport services; 5. other (what)? ......................................... | | | | | | | | | | | | | | | | | | | | | | | | | |
| D.4. If NO, do you or a member of your immediate family plan to benefit from tourism in the future? | | | | | | | | | | | | | | | YES / NO | | | | | | | | | | | | | | | | | | | | | | | | | |
| If YES, from what kind of activity?  *In this question, you can select any number of answers and add the answer "other"* | | | | | | | | | | | | | | | 1. agritourism; 2. catering services; 3. companies providing guide services; 4. companies providing transport services; 5. other (what)? ......................................... | | | | | | | | | | | | | | | | | | | | | | | | | |
| D.5. Is your or your immediate family member's income at least partially related to the wood industry? | | | | | | | | | | | | | | | YES / NO | | | | | | | | | | | | | | | | | | | | | | | | | |
| If YES, what kind of activity?  *In this question, you can select any number of answers and add the answer "other"* | | | | | | | | | | | | | | | 1. employee of the State Forests; 2. forestry - forestry work; 3. obtaining and using firewood, including the slash wood (branches); 4. d. other (what)? ........................................... . | | | | | | | | | | | | | | | | | | | | | | | | | |
| D.6. If NO, do you or a member of your immediate family plan to benefit from the wood industry in the future? | | | | | | | | | | | | | | | YES / NO | | | | | | | | | | | | | | | | | | | | | | | | | |
| If YES, from what kind of activity?  *In this question, you can select any number of answers and add the answer "other"* | | | | | | | | | | | | | | | 1. employee of the State Forests; 2. forestry - forestry work; 3. obtaining and using firewood, including the slash wood (branches); 4. d. other (what)? ........................................... . | | | | | | | | | | | | | | | | | | | | | | | | | |
| D.7. What, in your opinion, attracts tourists to the town the most?  *In this question, you can select any number of answers and add the answer "other"* | | | | | | | | | | | | | | | 1. landscape; 2. peace; 3. local culture, 4. tourist infrastructure, e.g. trails 5. other (what)? ........................................... . | | | | | | | | | | | | | | | | | | | | | | | | | |
| D.8. Please specify the nuisance of tourist traffic in your town: | | | | | | | | | | | | | | | | | | | | | | | | | | | | | | | | | | | | | | | | | |
| Small | |  | | | Rather small | | | |  | | Medium | | |  | | | Rather large | | | | | | |  | | Large | | | | | | | | |  | | |  | | | | |
| D.9.Please describe your attitude towards tourists coming to your town: | | | | | | | | | | | | | | | | | | | | | | | | | | | | | | | | | | | | | | | | | |
| Negative | |  | | | Rather negative | | | |  | | Neutral | | |  | | | Rather positive | | | | | | |  | | Positive | | | | | | | | |  | | |  | | | | |
| D.10. How do you assess the involvement of the commune authorities in the development of tourism?  (no answer means "I have no opinion") | | | | | | | | | | | | | | | | | | | | | | | | | | | | | | | | | | | | | | | | | |
| Very low | |  | | | Rather low | | | |  | | Medium | | |  | | | High | | | | | | |  | | Very high | | | | | | | | |  | | |  | | | | |
| D.11. In your opinion, does tourism destroy the natural environment of the town? | | | | | | | | | | | | | | | | | | | | | | | YES / NO | | | | | | | | | | | | | | | | | |
| If YES, how?  ………………………………………………………………………………………………………………. | | | | | | | | | | | | | | | | | | | | | | | | | | | | | | | | | | | | | | | | |

**D. 12. Please indicate to what extent you agree with the following statements.** Please circle only **ONE** answer for each question on the scale from **1 (No, I completely disagree) to 5 (Yes, I fully agree).**

| 1. More tourist should come to the town | 1 | 2 | 3 | 4 | 5 |
| --- | --- | --- | --- | --- | --- |
| 1. More agritourism farms and private accommodation for tourists should be built in the village | 1 | 2 | 3 | 4 | 5 |
| 1. More hotels, resorts and holiday homes should be built in the village | 1 | 2 | 3 | 4 | 5 |

**E. Finally, we ask for some information about you for the purposes of statistical analysis:**

**1.** **How old are you?** ………….

**2.** **Gender** (selects the interviewer)□ woman □ man

**3.** **What is your level of education?**

□ no/basic education □ vocational □ lower secondary/secondary □ post-secondary □ higher

**4.** **What is your professional situation?**

□ unemployed / inactive □ I work on a contract □ I run my own business □ I'm a student
□ retired / pensioner

**5.** **What is your profession (occupation)?** (if applicable)…………………………………

**6. How many people are there in your household?** ........................................ ............

**7. What is the average monthly net income in PLN / person in your household?**

…………………………………………….

**8.** **How many years have you lived in the commune?** ……………………

***THANK YOU FOR YOUR TIME AND ATTENTION!***
